# Supplementary material for: Community perceptions of behaviour change communication interventions of the maternal neonatal and child health programme in rural Bangladesh: an exploratory study
Source: BMC Health Serv Res. 2016 Aug 16;16:389. doi: 10.1186/s12913-016-1632-y (PMC4987986; doi:10.1186/s12913-016-1632-y)
Supplement: Additional file 2: — Informal group discussion guide. (PDF 21 kb) [file 12913_2016_1632_MOESM2_ESM.pdf]

### Informal group discussion guide

|                         |                       |
|-------------------------|-----------------------|
| Profession :            | Name: (Optional)      |
| Place of interview:     | Sex:                  |
| Date of interview:      | Interviewer name:     |
| Time interview started: | Time interview ended: |

#### General background:

- Please tell us about your work
- How long have you lived in this community?

#### What extent are BCC media attractive to the community members?

- What problems do you usually face in delivering health messages using BCC tools? (Why /why not?)
- What is your view/opinion about community perception on different BCC tools? (Ask about problems/which messages they followed willingly/Which they showed rigidity)
- What do you think, which BCC tool is more effective and communicative? (Mention all BCC tools (Posters, stickers, flip chart, folk songs, drama, verbal message)

#### Are these messages able to influence community practice// Do the messages appeal to the beliefs of the target audience

- Can you share your experience that focused how community people are benefitted with the type of strategies?
- What do you think how community people are influenced from these messages.

#### Recommendation

- How to make all those messages more communicative?
- Based on your experience, do you think there is any change needed at pictorial materials? (If Yes) Which one and why? What would be the possible changes?

*[Thank you very much for your time]*
